# Supplementary material for: Sex-based differences in conjunctival goblet cell responses to pro-inflammatory and pro-resolving mediators
Source: PubMed Central journal article supplement (PMC9522727; doi:10.1038/s41598-022-20177-9), 2022-09-29
Supplement: 41598_2022_20177_MOESM1_ESM.pdf [file 41598_2022_20177_MOESM1_ESM.pdf]

## **SUPPLEMENTARY DATA**

### **Sex-Based Differences in Conjunctival Goblet Cell Responses to Pro-Inflammatory and Pro-Resolving Mediators**

Menglu Yang, MD, PhD, Haakon K.Fjærvoll, Ketil A. Fjærvoll, Nicholas H. Wang , Tor P. Utheim, MD, PhD, Charles N. Serhan, PhD, DSc and Darlene A. Dartt, PhD

Supplementary Table 1: Sex and age of individual donors

| <b>NO.</b> | <b>SEX</b> | <b>AGE</b> |
|------------|------------|------------|
| 1          | M          | 76         |
| 2          | M          | 70         |
| 3          | M          | 65         |
| 4          | M          | 64         |
| 5          | M          | 48         |
| 6          | M          | 68         |
| 7          | F          | 56         |
| 8          | F          | 64         |
| 9          | M          | 74         |
| 10         | F          | 71         |
| 11         | M          | 58         |
| 12         | F          | 75         |
| 13         | M          | 57         |
| 14         | M          | 70         |
| 15         | F          | 71         |
| 16         | M          | 58         |
| 17         | F          | 64         |
| 18         | F          | 61         |
| 19         | F          | 48         |
| 20         | F          | 55         |
| 21         | F          | 55         |
| 22         | F          | 74         |
| 23         | M          | 73         |
| 24         | M          | 54         |
| 25         | M          | 71         |
| 26         | M          | 75         |
| 27         | M          | 63         |
| 28         | F          | 46         |
| 29         | M          | 67         |
| 30         | M          | 52         |
| 31         | M          | 72         |
| 32         | F          | 57         |
| 33         | M          | 57         |

A

Negative Control

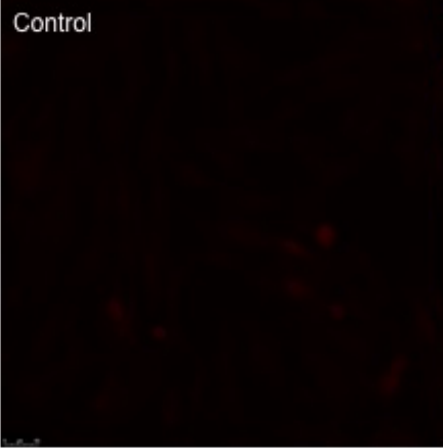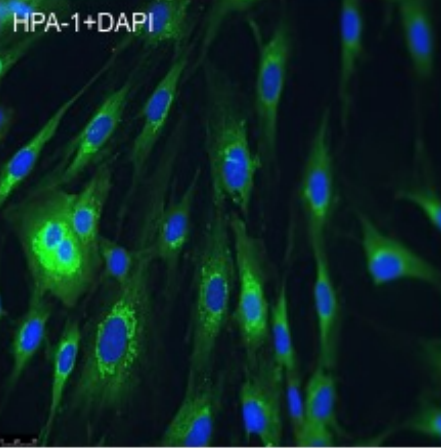

B

AR Peptide in Male

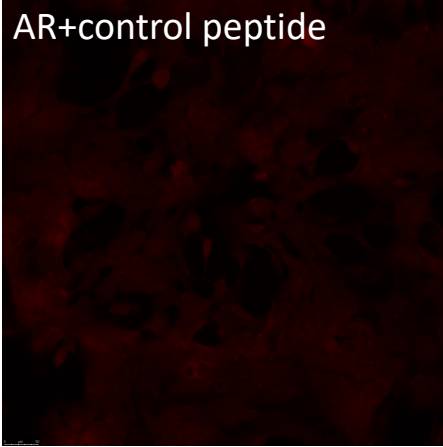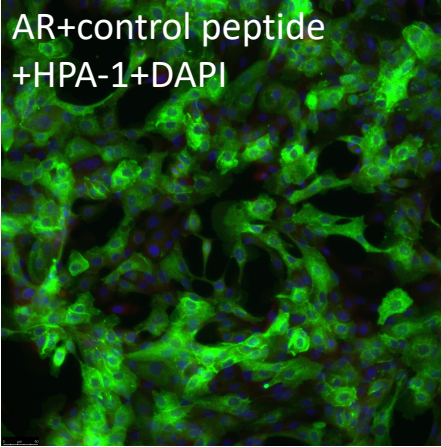

C

ER $\alpha$  Peptide in Female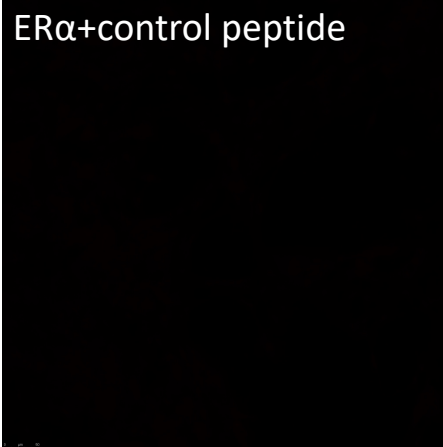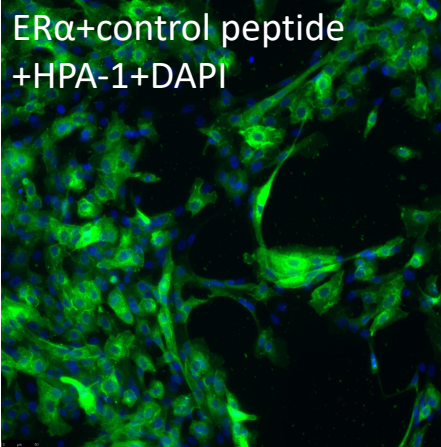

D

ER $\beta$  Peptide in Female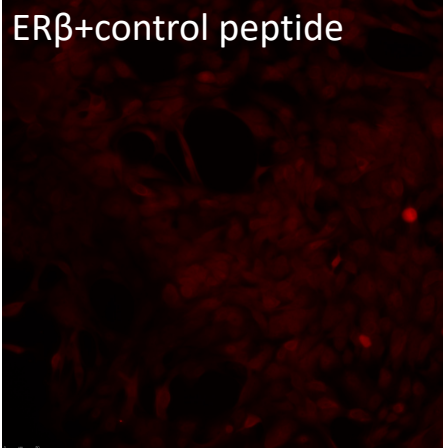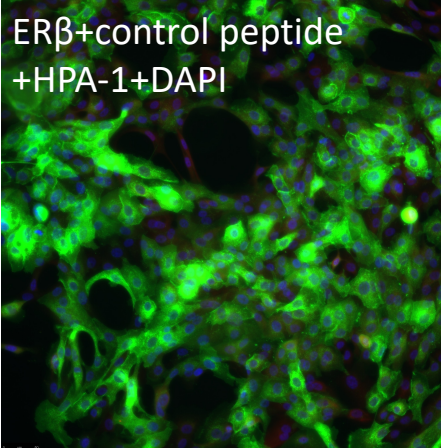

**Supplementary 1. Negative control and peptide control for ER $\alpha$ , ER $\beta$ , and AR staining in immunofluorescence microscopy.** Incubation of isotype control antibody for IF is shown in (A). The overlay of control and HPA which binds to secretory products in goblet cells (green) and DAPI (blue) that binds to cell nuclei are shown on the right. IF images of AR, ER $\alpha$ , and ER $\beta$  after corresponding control peptide treatment are shown in (B, C and D). The overlay of control and HPA (green) and DAPI (blue) are shown on the right.

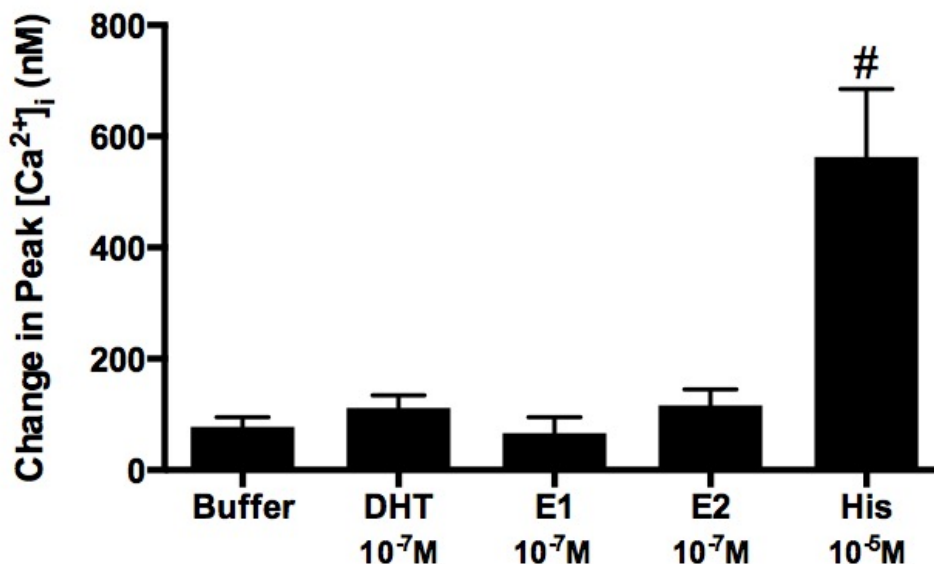

**Supplementary 2: Addition of sex hormones alone did not increase  $[Ca^{2+}]_i$  in cultured conjunctival goblet cells.** DHT, E1 or E2 ( $10^{-7}M$ ) was added to Fura 2 loaded conjunctival goblet cells. Vehicle (buffer) was added as negative control and histamine ( $10^{-5}M$ ) was used as positive control. The increase of  $[Ca^{2+}]_i$  was measured and the change in peak  $[Ca^{2+}]_i$  is shown. Data are mean  $\pm$  SEM from 3 individuals of mixed sexes. #Indicates significant difference from basal.

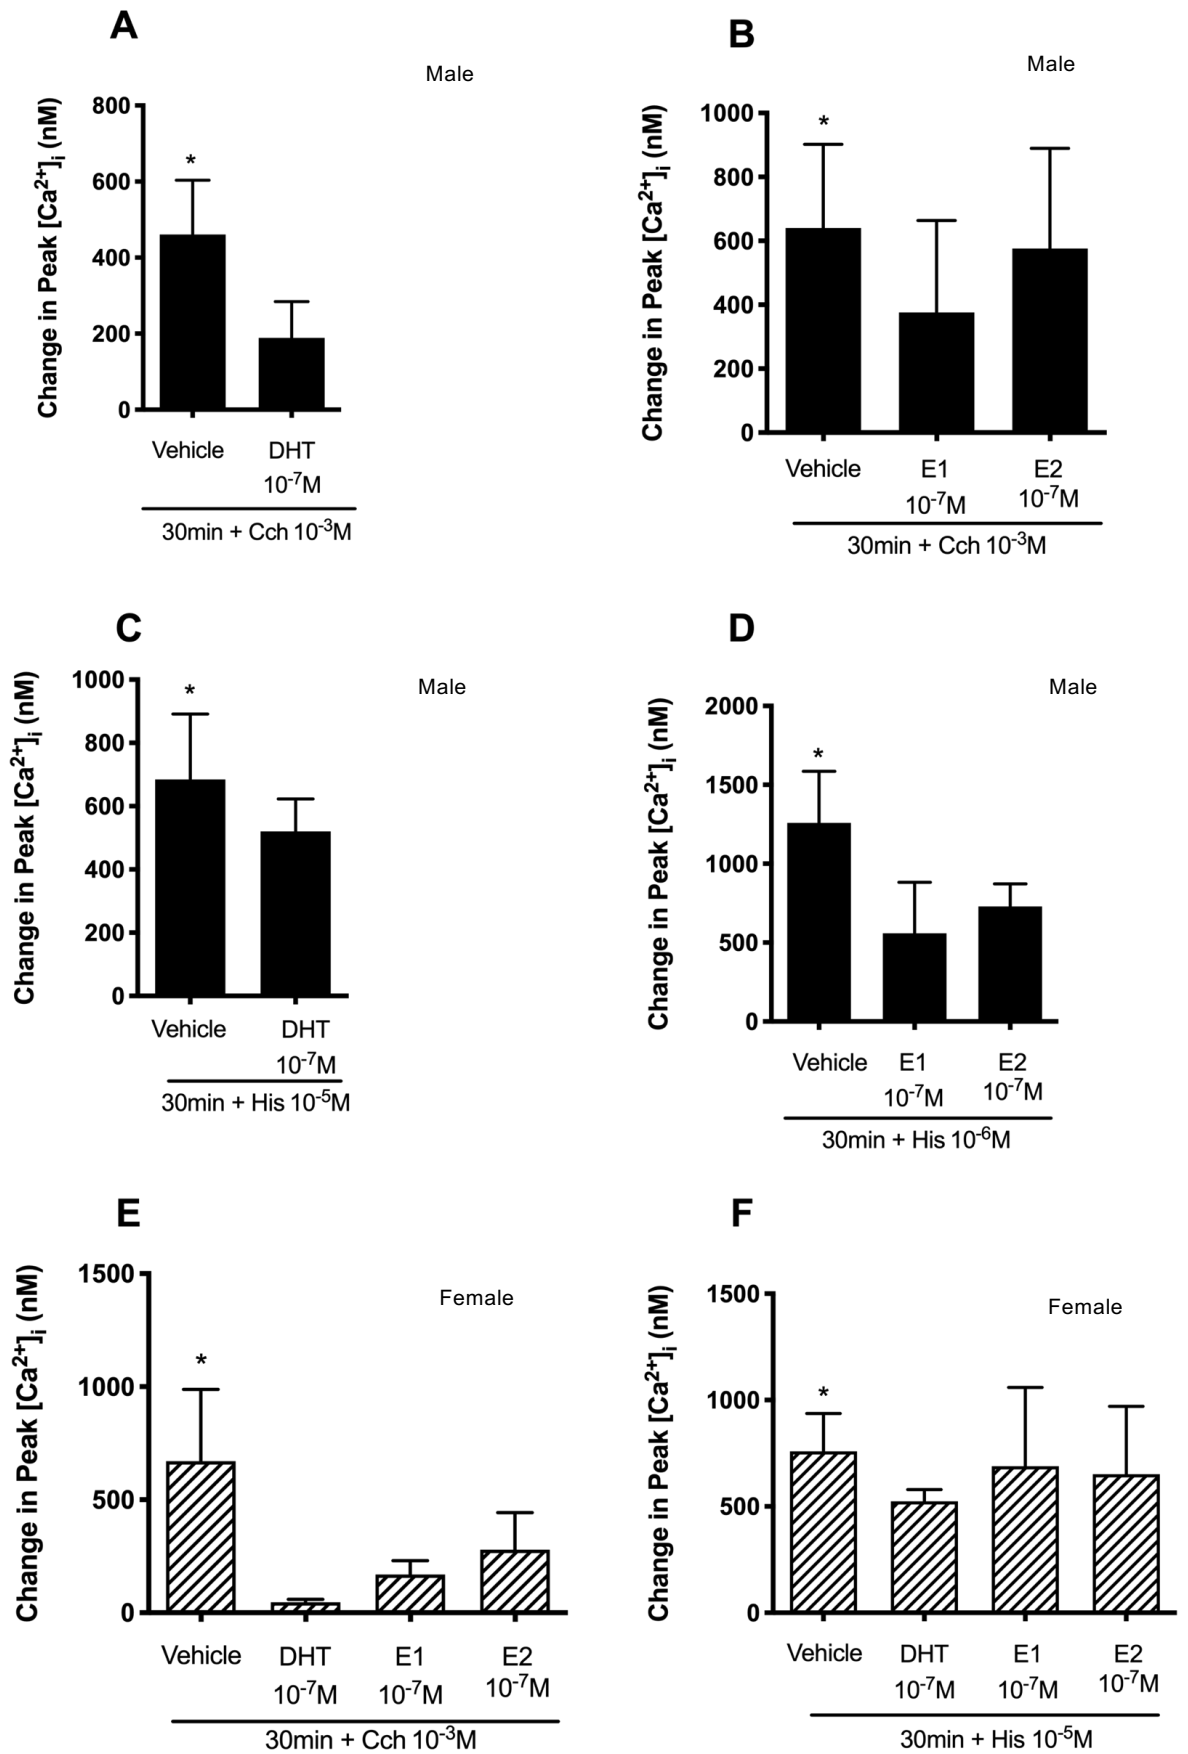

**Supplementary 3: Short-term treatment with sex hormones did not alter the male or female conjunctival goblet cell response to the cholinergic agonist (Cch) or the allergic mediator (histamine).** Cultured goblet cells from male or female cells were preincubated with DHT, E1 or E2 ( $10^{-7}$  M), or vehicle for 30 min prior to addition of carbachol (Cch ( $10^{-3}$  M) or histamine (His,  $10^{-6}$  M) and of Cch ( $10^{-3}$  M) (or His ( $10^{-6}$  M) [ $\text{Ca}^{2+}$ ]<sub>i</sub> was measured by Fura2 assay. Data are mean  $\pm$  SEM, n=8 for male and n=3 for female cells. Black lines indicate data from male cells, slash-patterned bars indicate data from females. \*Indicates significant difference from basal.

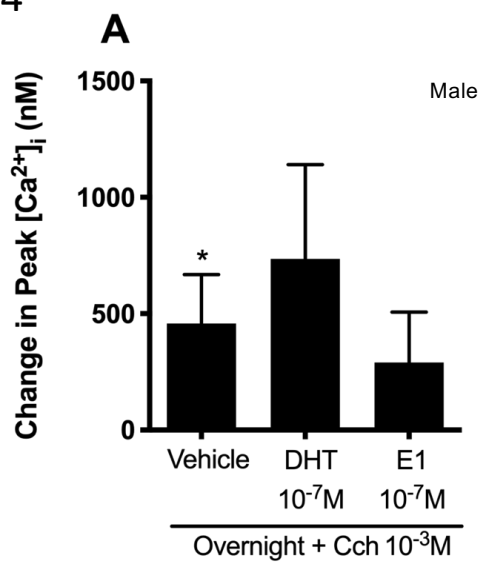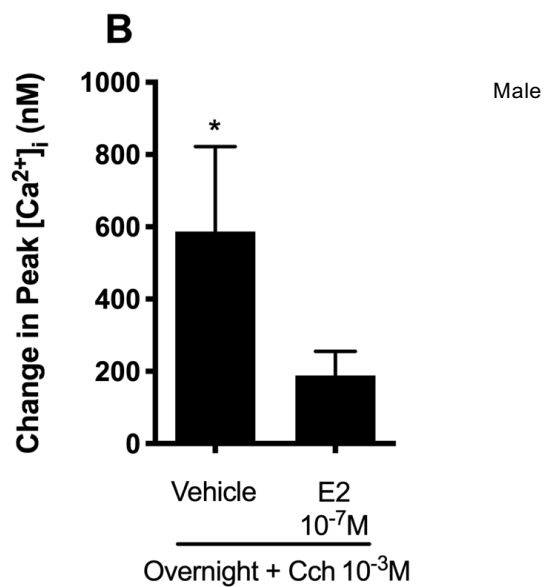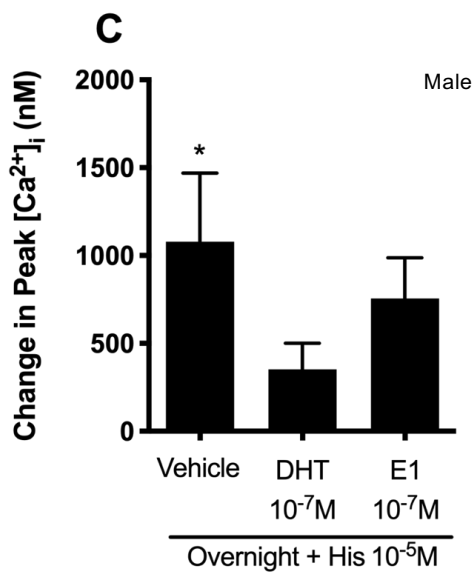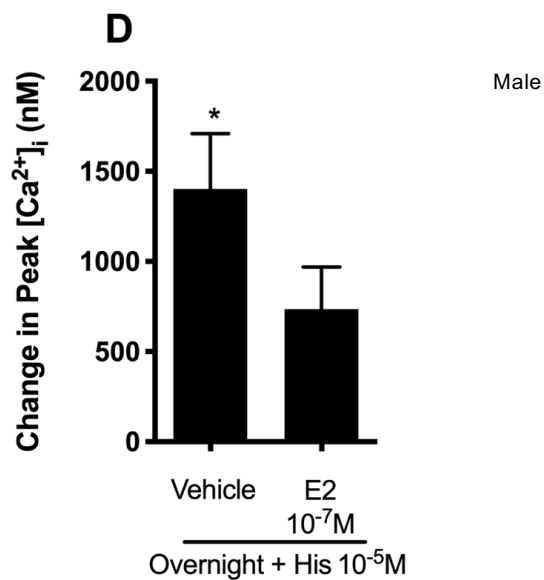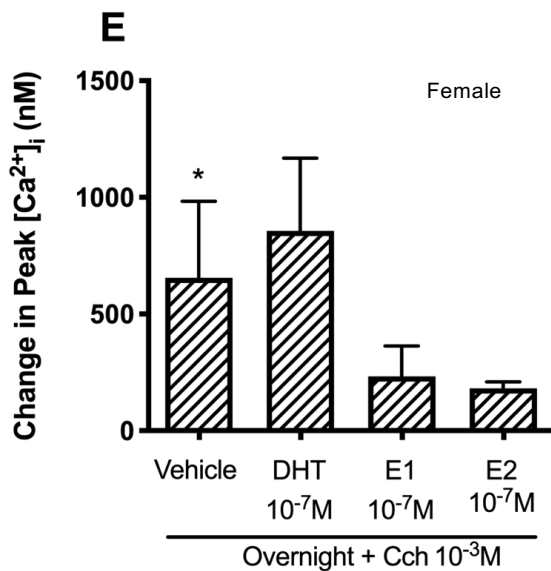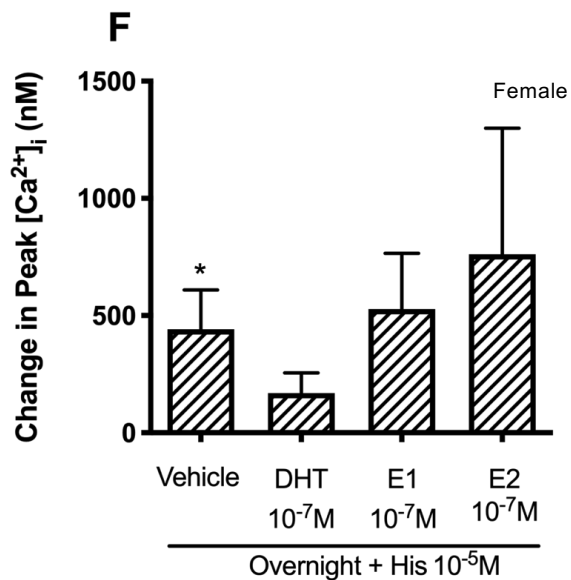



**Supplementary 4: Overnight treatment with sex hormones did not alter the male or female conjunctival goblet cell response to the cholinergic agonist carbachol (Cch) or the allergic mediator histamine (His).** Cultured goblet cells from male and female cells were preincubated with DHT, E1 or E2( $10^{-7}$  M) or vehicle for overnight prior to addition of Cch ( $10^{-3}$ M) or histamine ( $10^{-6}$ M).  $[Ca^{2+}]_i$  was measured by Fura2 assay. Data are mean  $\pm$  SEM, n=4 for male and n=3 for female cells. Solid bars indicate data from male cells, slash-patterned bars indicate data from female cells. \*Indicates significance difference from basal.

Supplementary 5: Raw data for RT-PCR

*Era*

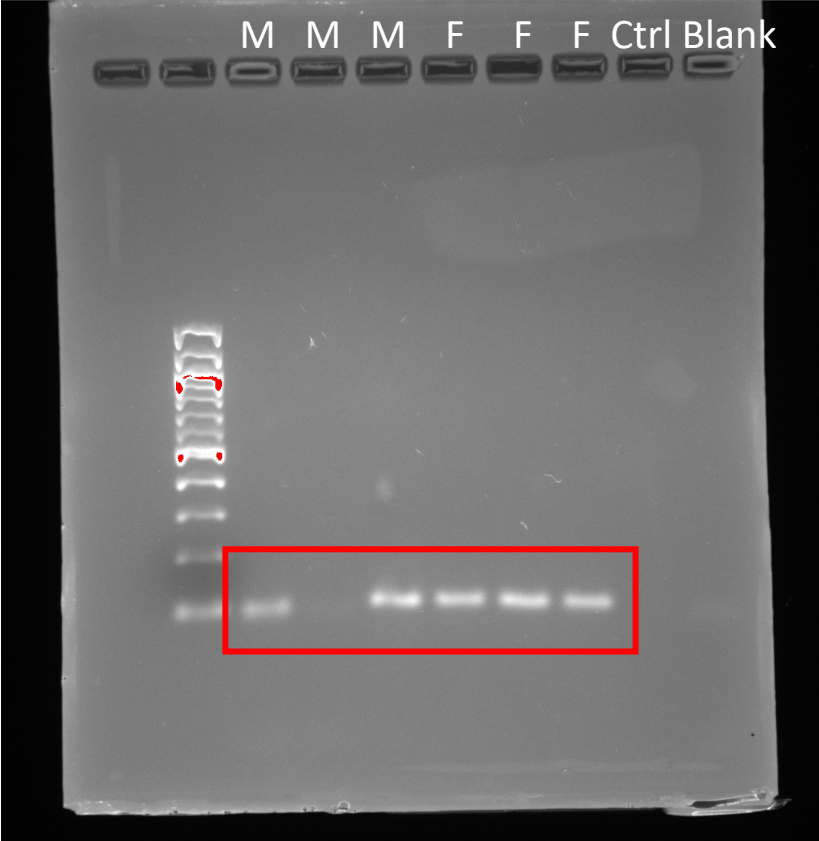

Raw image for Fig 1 A

*Era*

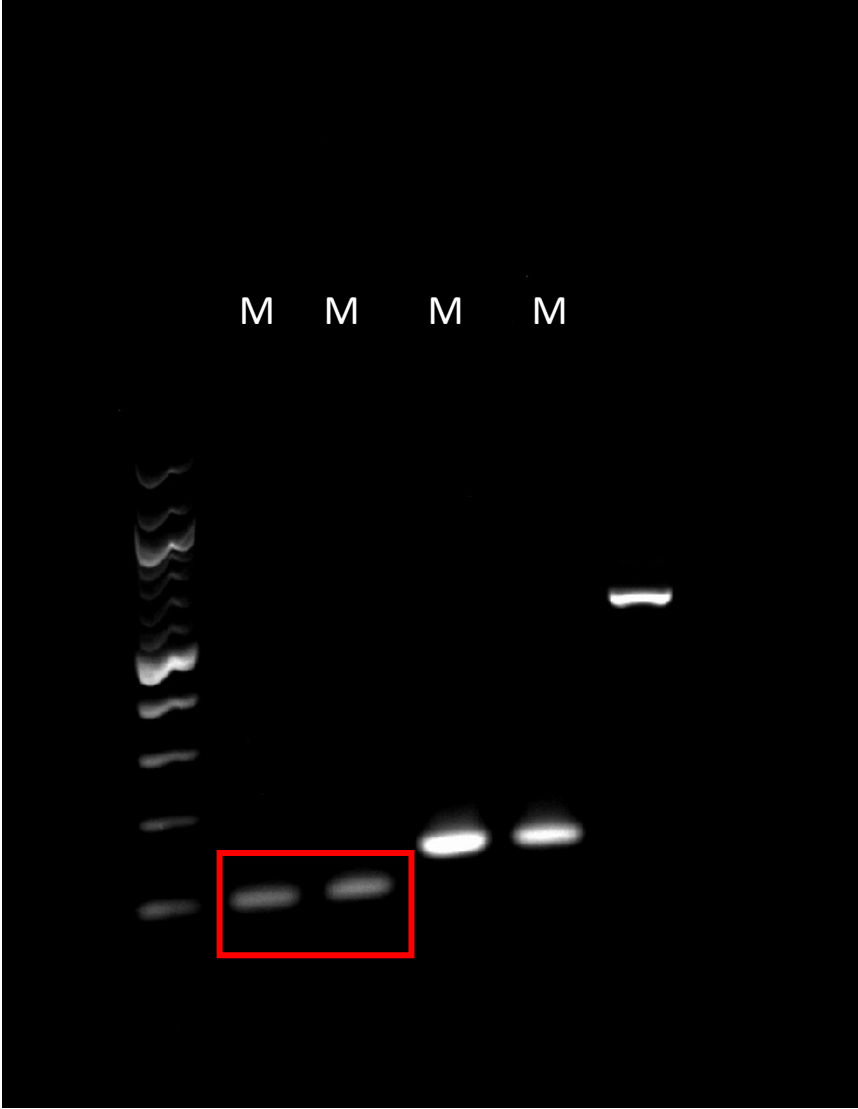

Raw image  
for Fig 1 A  
(1st and 2nd lane)

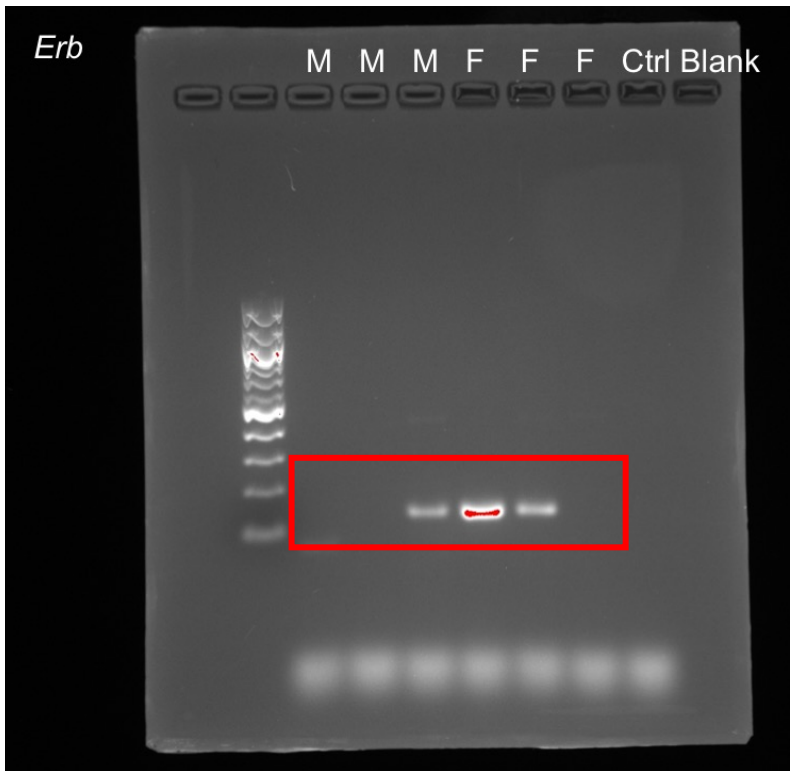

Raw image  
for Fig 2 A

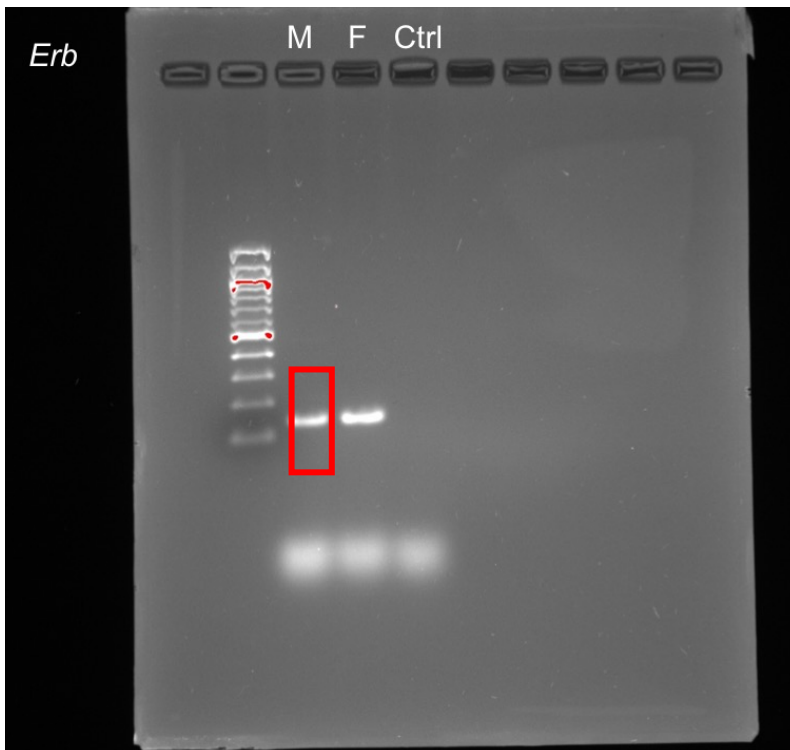

Raw image  
for Fig 2 A  
(F here act as  
positive control)

*Ar*

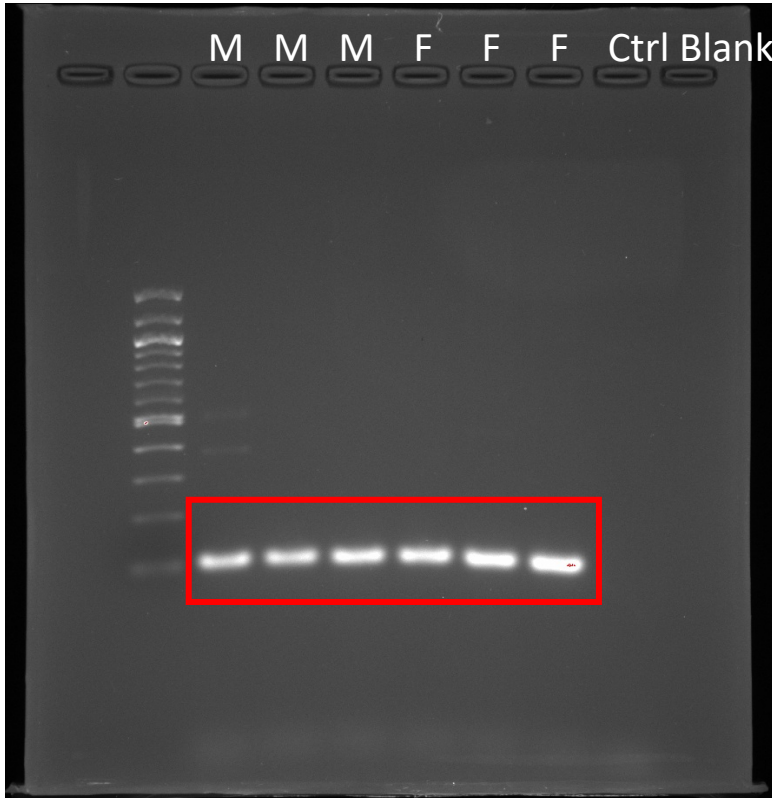

Raw image  
for Fig 3 A

## Supp 6: Raw data of WB

AR

M M F F

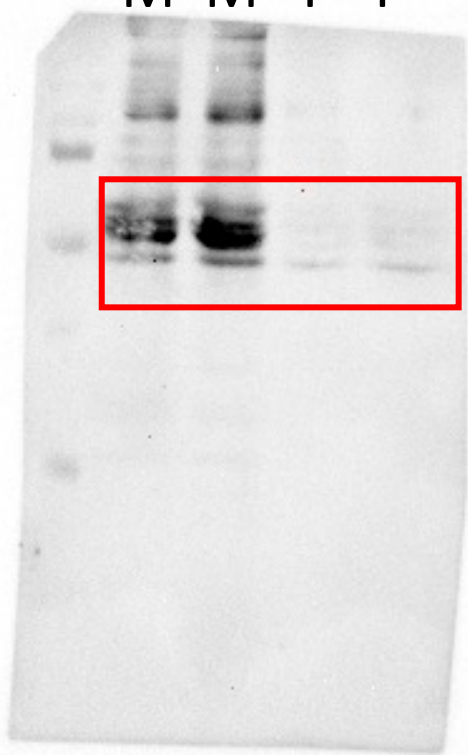

B-actin

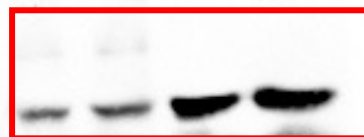

Raw data for Fig 3B (first 4 lines)

AR

B-actin

F F F

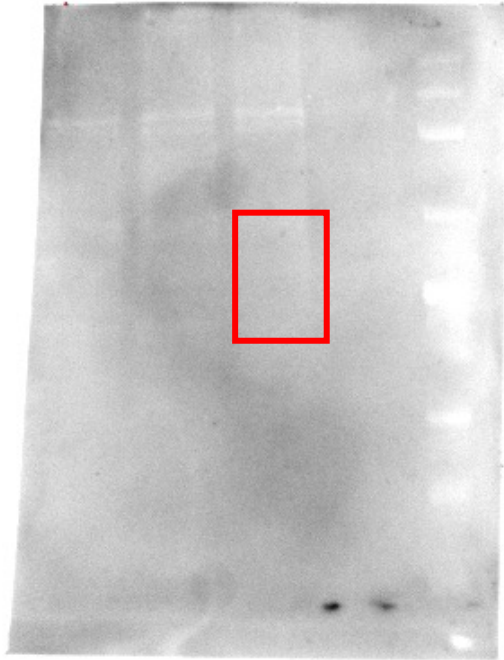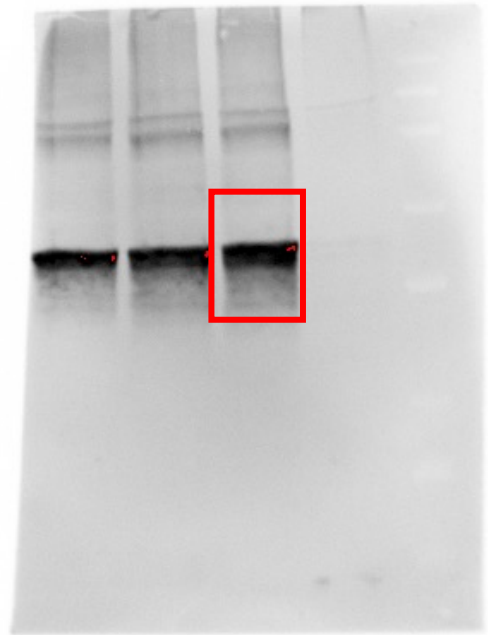

Raw data for Fig 3B (5th line)

ERa

M F F F M M

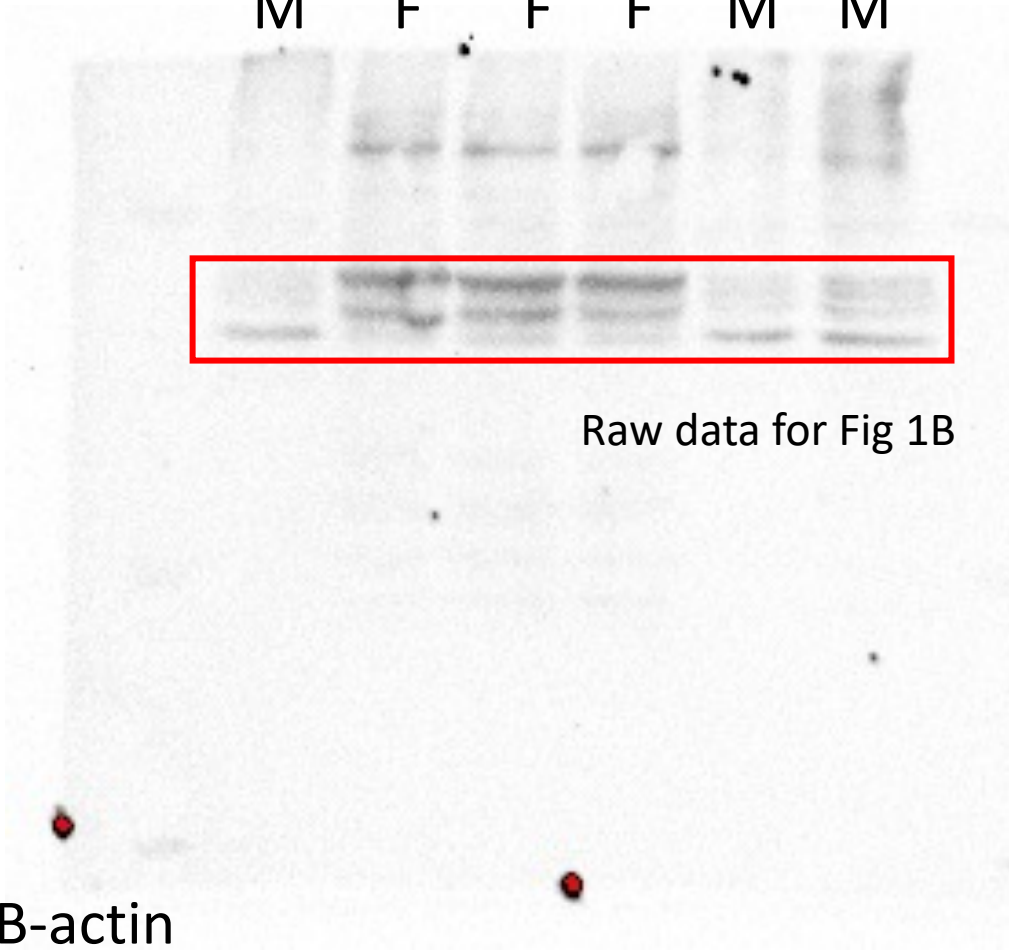

B-actin

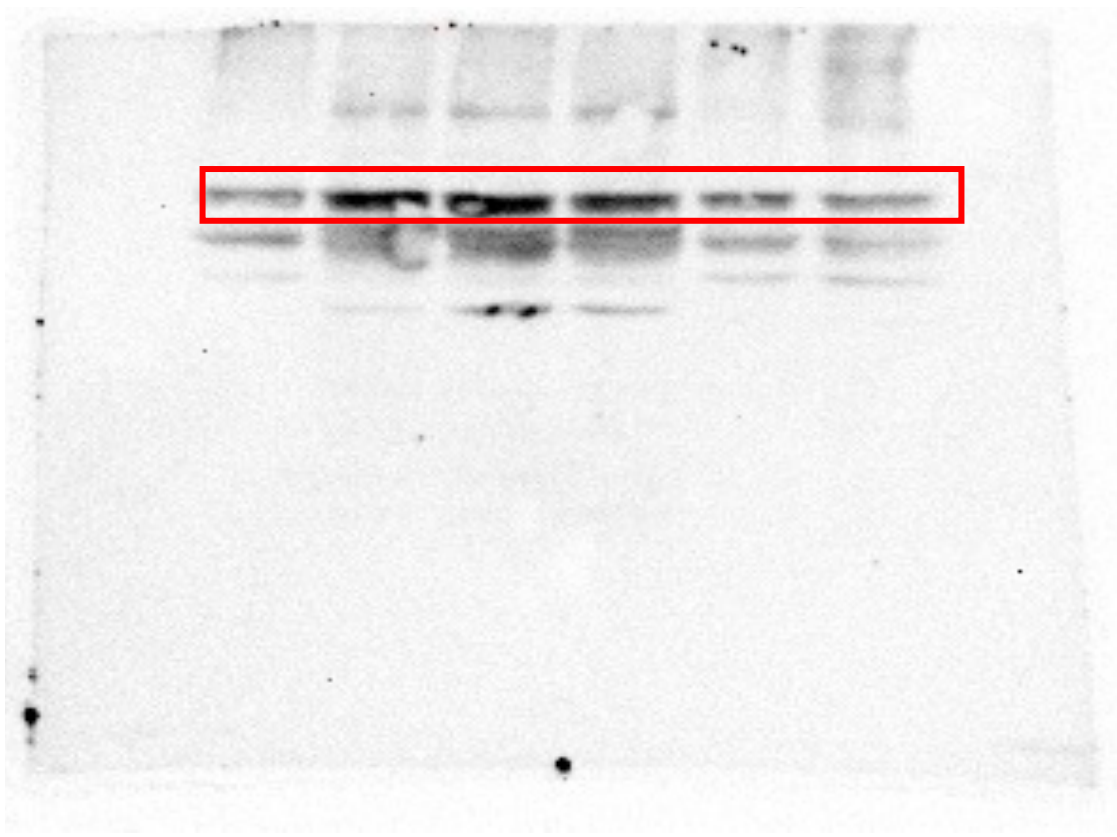



ERb

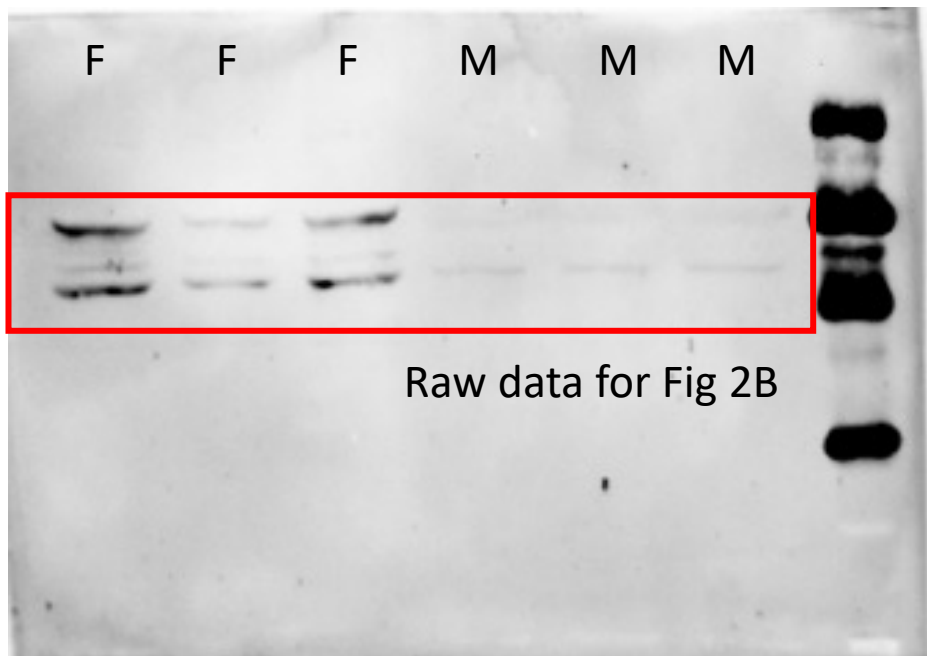

B-actin

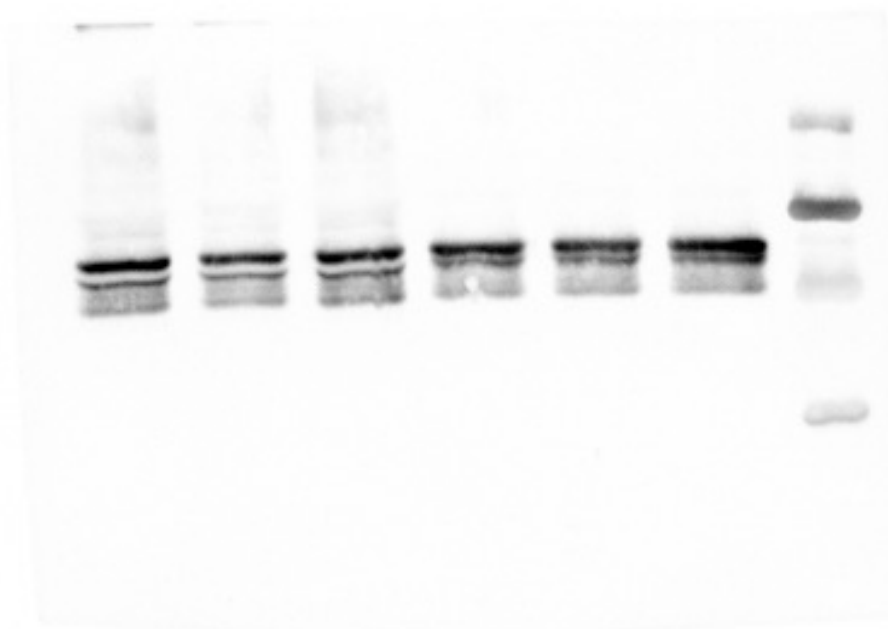

**Supplementary 6: Raw data for WB**

Supp 7

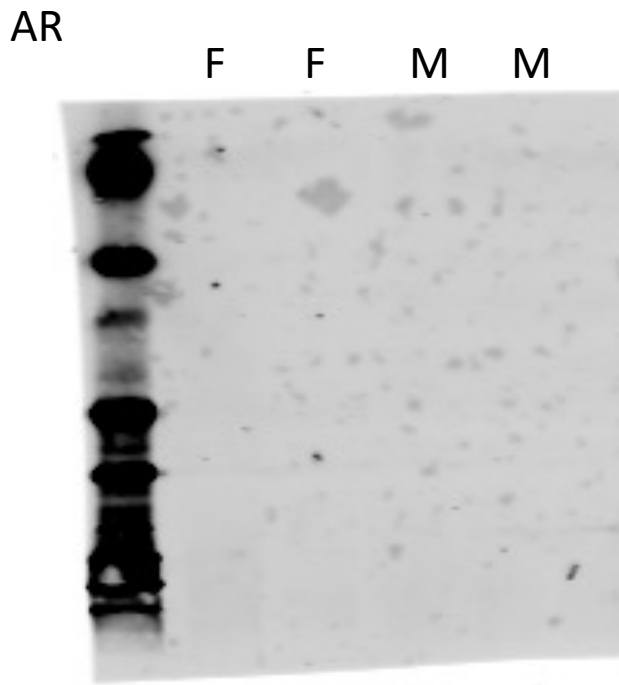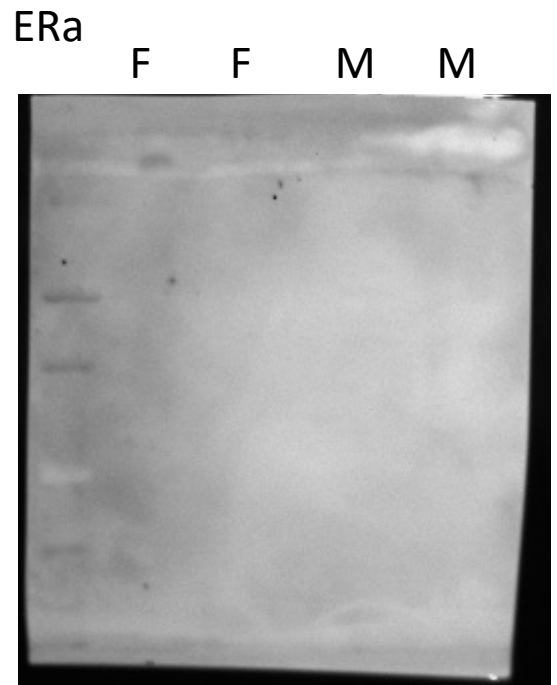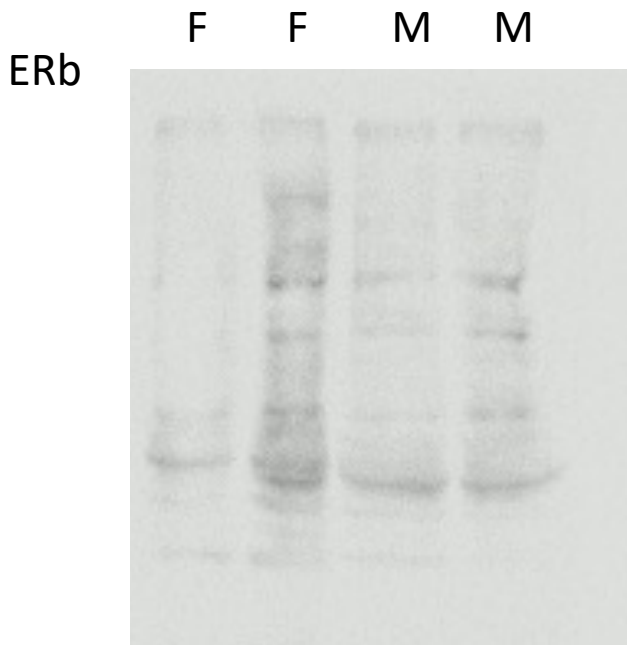

**Supplementary 7: Peptide control for ER $\alpha$ , ER $\beta$ , and AR in WB.**
